# Supplementary material for: CREB3L1 and CREB3L2 control Golgi remodelling during decidualization of endometrial stromal cells
Source: Front Cell Dev Biol. 2022 Oct 13;10:986997. doi: 10.3389/fcell.2022.986997 (PMC9608648; doi:10.3389/fcell.2022.986997)
Supplement: Supplementary file 14 [file Table8.xlsx]

## Sheet: Foglio1
Hormones, Growth Factors, Receptors	HUGO SYMBOL	EXPECTED	DEA output*		Exact match	Missing DE	Incoherent
AREG		UP	UP		1			Genelist from:	Birgit Gellersen, Jan J. Brosens
BMP2		UP	NDE			1			Cyclic Decidualization of the Human Endometrium in Reproductive Health and Failure
CNR1		UP	UP		1				Endocrine Reviews, December 2014, 35(6):851–905
EGFR		UP	NDE			1			DOI: 10.1210/er.2014-1045
IGFBP-1		UP	UP		1				Supplementary table 1
IGFBP-5		DOWN	NDE			1
INHA		UP	UP		1			*	if DE:	UP, upregulated compared to control (unstimulated, t0)
LEFTY2		UP	UP		1					DOWN, downregulated compared to control (unstimulated, t0)
PRL		UP	UP		1				if not DE:	NDE
RNL		UP	NDE			1
VEGFA		UP	UP		1
Neuropeptides, Receptors
Preprosomatostain	SST	UP	NDE			1
SSTR2	SSTR2	UP	UP		1
Chemockines, Cytokynes, Receptors
CCL2		UP	UP		1
CLL23		UP	NDE			1
CCL7		DOWN	NDE			1
CSF1		UP	UP		1
CSF2		UP	NDE			1
CSF3		UP	NDE			1
CXCL1		UP	UP		1
CXCR4		UP	UP		1
IL11		UP	UP		1
IL11RA		UP	UP		1
IL13RA2		UP	UP		1
IL15		UP	UP		1
IL1R1		UP	UP		1
IL1R2		UP	UP		1
IL33		UP	NDE			1
IL6		UP/DOWN	NDE			1
IL8		UP	NDE			1
Transcription Factors
CEBPB		UP	UP		1
FOXO1		UP	UP		1
FOXO3		DOWN	DOWN		1
HAND2		UP	UP		1
HOXA10		UP	UP		1
ICER	CREM	UP	UP		1
NR4A1		UP	UP		1
TWIST1		UP	NDE			1
ZBTB16		UP	UP		1
Epigenetic Regulation
ASXL1		DOWN	DOWN		1
BRD3		DOWN	NDE			1
BRD4		DOWN	NDE			1
DNMT3B		DOWN	DOWN		1
EZH2		DOWN	DOWN		1
HELLS		DOWN	DOWN		1
UHRF1		DOWN	DOWN		1
Steroid Hormone Signaling
DHRS3		UP	UP		1
ESRRA		UP	NDE			1
FKBP4		UP	UP		1
GR	NR3C1	DOWN	NDE			1
HSD11B1		UP	UP		1
MR	NR3C2	DOWN	NDE			1
PGRMC1		DOWN	UP				1
PHB2		DOWN	NDE			1
Cell Cycle
Cyclyin B	B1/B2	DOWN	DOWN		1
OIP5		DOWN	DOWN		1
Metabolism
DHRS3		UP	UP		1
GLUT1	SLC2A1	UP	NDE			1
GRIA1		DOWN	DOWN		1
PDIA1		UP	NDE			1
PLD1
SLC7A8		UP	UP		1
TGM2		UP	UP		1
Stress Response
GADD45a	GADD45A	UP	UP		1
GPX3		UP	UP		1
SOD2		UP	UP		1
Signal Transduction, Channels
c-SRC	SRC	UP	NDE			1
DKK1		UP	UP		1
DUSP1		UP	UP		1
frpHE	SFRP4	DOWN	NDE			1
HSP27	HSPB1	UP	NDE			1
KCNK3		UP	UP		1
NOTCH		UP	NDE			1
PDE4A		UP	UP		1
PKA subunit RIα	PRKAR1A	DOWN	NDE			1
RASD1		UP	UP		1
SGK1		UP	UP		1
STAT3		UP	UP		1
STAT5B		UP	UP		1
TLR2		DOWN	NDE			1
WNT4		UP	UP		1
WNT5A		UP	UP		1
Cytoskeleton Organization, Cell Adhesion, Gap Junctions
α Actin	ACTN1/4	DOWN	DOWN		1
ACTA2		DOWN	UP				1
CALD1		DOWN	NDE			1
CDH11		UP	UP		1
CTTN		UP	NDE			1
CX43	GJA1	UP	UP		1
ICAM1		UP	NDE			1
ITGAV		UP	NDE			1
ITGB3		UP	NDE			1
LASP1		DOWN	DOWN		1
MYL2		DOWN	NDE			1
PCDH7		DOWN	DOWN		1
TAGLN	TAGLN2	DOWN	UP				1
TPM4	TPM4	UP	DOWN				1
Extracellular Matrix Organization
Collagen IV	COL4A4/A6	UP	UP		1
DCN		UP	UP		1
Fibronectin	FN1	UP	DOWN				1
Fibulin	FBLN1/2/5	UP	UP		1
Laminin	UP: LAM A2; B1/2/4; C1/C2; DOWN: A1/4, B3	UP	UP		1
SPARCL1		UP	UP		1
SPP1		UP	NDE			1
Hemostasis
F3		UP	UP		1
PAI-1	SERPINE1	UP	UP		1
Proteases, Protease Inhibitors
CTSB		UP	NDE			1
MME		UP	NDE			1
MMP1		DOWN	DOWN		1
MMP2		UP	UP		1
MMP3		DOWN	DOWN		1
MMP9		UP	NDE			1
PCSK5		UP	UP		1
PLAT		DOWN	UP				1
PLAU		DOWN	DOWN		1
SERPINE1		UP	UP		1
TIMP3		UP	UP		1
Tumor Proteins, Tumor Suppressors, Metastasis Suppressors
CD82		Up, translational regulation
TP53		Up, translational regulation
WT1		UP	UP		1
Sum				tot genes	73	37	6	116
	Observed
		Not DE	DE
	Not target list	11937	4707
	Target list	37	73
Note:	Incoherent expression was treated as a DEG gene that has no corrispondence with genes in the target list.
One sided Fisher's Exact test: p-value	2.2e-16
(alternative: "greater" from R)	Enrichment of Decidulization-Associated genes is significant in DEG list for t144h
